# Supplementary material
Source: MDPI journal article supplement (https://www.mdpi.com/2077-0472/11/4/311)
Supplement: s1 [file s1]

## Supplementary materials

### Title: Distribution, Genetic Diversity and Population Structure of *Aegilops tauschii* Coss. in Major Wheat Growing Regions in China

Table S1. The geographic locations of 192 *Aegilops tauschii* Coss. populations used in the genetic diversity analysis.

| Population code | Location                                                                        |
|-----------------|---------------------------------------------------------------------------------|
| 1               | Qianyuan Village Kongzhongguo Town Yancheng County Luohe City Henan Province    |
| 2               | Guandao Village Houzhen Town Liantian County Weinan City Shaanxi Province       |
| 3               | Bawang Village Gushi Town Linwei County Weinan City Shaanxi Province            |
| 4               | Su Village Jinchengban Town Hancheng County Weinan City Shaanxi Province        |
| 5               | Dongwu Village Wenkou Town Daiyue County Taian City Shandong Province           |
| 6               | Shiwu Village Liuwang Town Ningyang County Taian City Shandong Province         |
| 7               | Hongmiao Village Chengguan Town Renping County Liaocheng City Shandong Province |
| 8               | Xiwang Village Liangjia Town Henjin County Yuncheng City Shanxi Province        |
| 9               | Xiqu Village Gujiao Town Xinjiang County Yuncheng City Shanxi Province          |
| 10              | Shishi Village Ganting Town Hongtong County Linfen City Shanxi Province         |
| 11              | Xin Village Sansi Town Nanhe County Xingtai City Hebei Province                 |
| 12              | Beichangbao Village Caohe Town Xushui County Baoding City Hebei Province        |
| 13              | Nanguan Village Longyao Town Longyao County Xingtai City Hebei Province         |
| 14              | Didi Village Longyao Town Longyao County Xingtai City Hebei Province            |
| 15              | Beixingzhuang Town Xingtai County Xingtai City Hebei Province                   |
| 16              | Donghan Village Heyang Town Nanhe County Xingtai City Hebei Province            |
| 17              | Yan Village Luyi Town Guantao County Handan City Hebei Province                 |
| 18              | Shanqiao Village Liucun Town Yaodu District Linfen City Shanxi Province         |
| 19              | Sabxiaoying Village Huqiao Town Hui County Xingxiang City Henan Province        |
| 20              | Fanzhong Village Gaosi Town Xiangcheng City Henan Province                      |

- 21 Huangzhong Village Gaosi Town Xiangcheng City Henan Province
- 22 Xiaoluo Zhuang Village Dawu Town Shanshui County Zhoukou City Henan Province
- 23 Qiliying Village Xinxiang County Xinxiang City Henan Province
- 24 Guzong Town Suiyang District Shanqiu City Henan Province
- 25 Chouhuazhuang Village Shanyang District Jiaozuo City Henan Province
- 26 Dazhangzhuang Village Zhaocun Town Ningling County Shanqiu City Henan Province
- 27 Wangtun Neihuang County Anyang City Henan Province
- 28 Dazhangzhuang Village Zhaocun Town Ningling County Shangqiu City Henan Province
- 29 Changge City Henan Province
- 30 Yancheng County Luohe City Henan Province
- 31 Yucheng County Shangqiu City Henan Province
- 32 Zhonglou Street Ruzhou City Henan Province
- 33 Luyi County Xiangcheng City Henan Province
- 34 Qinyang City Henan Province
- 35 Minquan County Shanqiu City Henan Province
- 36 Qibin District Hebi City Henan Province
- 37 Jun County Hebi City Henan Province
- 38 Yuanyang County Xinxiang City Henan Province
- 39 Mengjin County Luoyang City Henan Province
- 40 Luquan City Hebei Province
- 41 Gaocheng District Shijiazhuang City Hebei Province
- 42 Wudi County Binzhou City Shandong Province
- 43 Liupo Village Shangzhuang Town Xinye County Nanyang City Henan Province
- 44 No.2 Weinan road Hua County Shaanxi Province
- 45 No.35 Weinan road Hua County Shaanxi Province
- 46 No.46 Weinan road Hua County Shaanxi Province
- 47 Wenjiatan Village Changxing Town Mei County Baoji City Shaanxi Province
- 48 Yangjia Village Changxing Town Mei County Baoji City Shaanxi Province
- 49 Majia Village Changxing Town Mei County Baoji City Shaanxi Province
- 50 Diyao Village Gushi Town Linwei District Weinan City Shaanxi Province
- 51 Jinpo Village Lindian Town Linwei District Weinan City Shaanxi Province
- 52 Jiangjia Village Guandi Town Linwei District Weinan City Shaanxi Province
- 53 Qixiyi Village Mui Town Chencang District Baoji City Shaanxi Province
- 54 Guangfu Village Jiacun Town Chencang District Baoji City Shaanxi

- Province
- 55 Dongpo Village Muyi Town Chencang District Baoji City Shaanxi Province
  - 56 Wujiazhai Village Jingyao Town Pucheng County Weinan City Shaanxi Province
  - 57 Yian Village Pucheng County Weinan City Shaanxi Province
  - 58 Jiyuan Village Jinggan Town Jingyang County Xianyang City Shaanxi Province
  - 59 Liujie Village Zhongzhang Town Jingyang County Xianyang City Shaanxi Province
  - 60 Chuniu Village Qiaodi Town Jingyang County Xianyang City Shaanxi Province
  - 61 Yaodian Village Yaodian Town Weicheng District Xianyang City Shaanxi Province
  - 62 Waliu Village Dizhang Town Weicheng District Xianyang City Shaanxi Province
  - 63 Yangwan Village Zhengyang Town Weicheng District Xianyang City Shaanxi Province
  - 64 Beidian Village Yuemiao Town Huaying City Shaanxi Province
  - 65 Hengxi Village Luofu Town Huaying City Shaanxi Province
  - 66 Yuhuangge Village Xin District Tongchaung City Shaanxi Province
  - 67 Xiaoxi Village Huizhou Diantrict Tongchaung City Shaanxi Province
  - 68 Xiayang Village Qiachuan Town Heyang County Weinan City Shaanxi Province
  - 69 Shendong Village Qiachuan Town Heyang County Weinan City Shaanxi Province
  - 70 Nancai Village Wangcun Town Heyang County Weinan City Shaanxi Province
  - 71 Liuqu Town Fuping County Weinan City Shaanxi Province
  - 72 Qi Village Gongli Town Fuping County Weinan City Shaanxi Province
  - 73 Nanyu Village Zhuangtou Town Xingping County Xianyang City Shaanxi Province
  - 74 Shuidaokou Village Fengyi Town Xingping County Xianyang City Shaanxi Province
  - 75 Dongtiangong Village Kongcun Town Pingyin County Jinan City Shandong Province
  - 76 Dongtiangong Village Kongcun Town Pingyin County Jinan City Shandong Province
  - 77 Liuying Village Pengji Street Dongping County Taian City Shandong Province
  - 78 Huangzhuang Village Xihu Town Dongping County Taian City Shandong Province
  - 79 Tingpo Village Zhoucheng Street Dongping County Taian City Shandong Province
  - 80 Gulugou Village Quanpu Town Liangshan County Jining City Shandong Province
  - 81 Sunzhuang Village Lvling Town Mudan District Heze City Shandong

- Province
- 82 Zhangwutun Village Dinglichang Town Yuncheng County Heze City Shandong Province
  - 83 Ligai Village Suiguantun Town Yuncheng County Heze City Shandong Province
  - 84 Xiguo Village Wolongshan Town Jiaxiang County Jining City Shandong Province
  - 85 Qiaoying Village Anju Street Rencheng District Jining City Shandong Province
  - 86 Guoli Town Zoucheng City Jining City Shandong Province
  - 87 Puzaoyang Village Leping Town Dongge County Liaocheng City Shandong Province
  - 88 Shenyizhuang Village Guan County Liaocheng City Shandong Province
  - 89 Xidacheng Village Dawangzhai Town Shen County Liaocheng City Shandong Province
  - 90 Dajiangzhuang Village Shenting Town Shen County Liaocheng City Shandong Province
  - 91 Xingluo Village Gaoliu Town Qingzhou City Weifang City Shandong Province
  - 92 Linzeyi Village Tianliu Town Shouguang City Weifang City Shandong Province
  - 93 Linzesan Village Tianliu Town Shouguang City Weifang City Shandong Province
  - 94 Lijiananshaoyi Village Shangkou Town Shouguang City Weifang City Shandong Province
  - 95 Menbajie Village Liutong Town Changyi City Weifang City Shandong Province
  - 96 Beixujiazhuang Village Liutong Town Changyi City Weifang City Shandong Province
  - 97 Beixujia Village Changle Town Pingdu County Qingdao City Shandong Province
  - 98 Duijiulijia Village Laizhou City Yantai City Shandong Province
  - 99 Jiadengyangjia Village Pinglidian Town Laizhou City Yantai City Shandong Province
  - 100 Hexiwangjia Village Canzhuang Town Zhaoyuan City Yantai City Shandong Province
  - 101 Zhongxinpo Village Lutou Town Longkou City Yantai City Shandong Province
  - 102 Dongzhaunqu Village Beima Town Longkou City Yantai City Shandong Province
  - 103 Xujiazhuang Village Xinjia Street Longkou City Yantai City Shandong Province
  - 104 Zhouchentun Village Ligezhaung Town Jiaozhou City Qiangdao City Shandong Province
  - 105 Shangyuanjiaguangzhuang Village Lingyang Town Ju County Rizhao City Shandong Province
  - 106 Yangjiazhifang Village Lingyang Town Ju county Rizhao City Shandong Province

- 107 Shengli Town Tancheng County Linyi City Shandong Province
- 108 Gengzhuang Village Lanling Town Cangshan County Linyi City Shandong Province
- 109 Fuhou Village Lanling Town Cangshan County Linyi City Shandong Province
- 110 Yezhuang Village Kou Town Laicheng District Laiwu City Shandong Province
- 111 Weihe Village Huantai County Zibo City Shandong Province
- 112 Zhenwumiao Village Yangzhuang Town Laicheng County Laiwu City Shandong Province
- 113 Dongwang Village Lizhuang Town Huimin County Binzhou City Shandong Province
- 114 Xichenjia Village Fenghuang Town Lizi District Zibo City Shandong Province
- 115 Duanheyi Village Daozhuang Town Guangrao County Dongying City Shandong Province
- 116 Qianwang Village Beisong Town Lijin County Dongying City Shandong Province
- 117 Xiyisan Village Yongan Town Kenli County Dongying City Shandong Province
- 118 Sunfang Village Huagou Town Gaoshou County Zibo City Shandong Province
- 119 Hejiaqiao Village Dagao Town Zhanhua County Binzhou City Shandong Province
- 120 Chengbei Village Xincheng Town Huantai County Zibo City Shandong Province
- 121 Dongan Village Jixia Street Linzi District Zibo City Shandong Province
- 122 Liujiashuang Village Bianyuan Town Feicheng County Taian City Shandong Province
- 123 Zhaizi Village Luhui Street Gaoqing County Zibo City Shandong Province
- 124 Xinzhuang Village Daozhuang Town Guangrao County Dongying City Shandong Province
- 125 Qianma Village Xindian Town Huimin County Binzhou City Shandong Province
- 126 Xiwenfang Village Zhaocun Town Xingping City Xianyang City Shaanxi Province
- 127 Jutou Village Mingdu Town Changan District Xian City Shaanxi Province
- 128 Cao Village Dazhao Town Changan District Xian City Shaanxi Province
- 129 Shuangqiao Village Pucun Town Qishan County Baoji City Shaanxi Province
- 130 Songcun Village Yidian Town Qishan County Baoji City Shaanxi Province
- 131 Xifengtou Village Shangcun Town Zhouzhi County Xian City Shaanxi Province
- 132 Qiliang Village Jiufeng Town Zhouzhi County Xian City Shaanxi Province

- 133 Wu Village Quan Town Sanyuan County Xianyang City Shaanxi Province
- 134 Dongliu Village Dacheng Town Sanyuan County Xianyang City Shandong Province
- 135 Niumazhuang Village Yanzhuang Town Gangcheng District Laiwu City Shandong Province
- 136 Yanjiamiao Village Anjiazhuang Town Feicheng County Taian City Shandong Province
- 137 Maxujia Village Hefang Town Huimin County Binzhou City Shandong Province
- 138 Wuqing District Tianjin City
- 139 Dizhuang Village Daliang Town Wuqing District Tianjin City
- 140 Hui County Xinxiang City Henan Province
- 141 Jun County Hebi City Henan Province
- 142 Wen County Jiaozuo City Henan Province
- 143 Yangying Village Shian Town Xinye County Nanyang City Henan Province
- 144 Yuhuangmiao Village Wangzhuang Town Xinye County Nanyang City Henan Province
- 145 Guaili Village Shayan Town Xinye County Nanyang City Henan Province
- 146 Xiayi County Shangqiu City Henan Province
- 147 Beizhoubi Village Dahuaishu Town Hongtong County Linfen City Shanxi Province
- 148 Shishi Village Ganting Town Hongtong County Linfen City Shanxi Province
- 149 Quting Village Quting Town Hongtong County Linfen City Shanxi Province
- 150 Caopuzi Village Sanhe Town Huozhou City Linfen City Shanxi Province
- 151 Huaiyin District Huaian City Jiangsu Province
- 152 Laoliuxu Village Sihong Town Suqian City Jiangsu Province
- 153 Zhangying Village Zhengji Town Yicheng County Xiangyang City Hubei Province
- 154 Emin County Tacheng District Xinjiang Province
- 155 Wangyanzhuang Village Zhuangzhuangzhai Town Xiao County Suzhou City Anhui Province
- 156 Fucheng Town Fengyang County Chuzhou City Anhui Province
- 157 Xiaohe Town Yicheng County Xiangyang City Hubei Province
- 158 Beijing
- 159 Guanglu Town Ci County Handan City Hebei Province
- 160 Donghouzhao Village Cichuan Town Ci County Handan City Hebei Province
- 161 Xiying Village Ducunji Town Linzhang County Handan City Hebei Province
- 162 Ganglingcheng Village Linzhang Town Linzhang County Handan City Hebei Province

- 163 Zhi Village Tiantaishan Town Feixiang District Handan City Hebei Province
- 164 Xisu Town Yongnian District Handan City Hebei Province
- 165 Liuhan Village Liuhan Town Yongnian District Handan City Hebei Province
- 166 Xishawo Village Zizhong Town Nangong City Xingtai City Hebei Province
- 167 Yuanjiazhuang Village Xintun Town Zaoqiang County Hengshui City Hebei Province
- 168 Hujiachi Town Shenzhou City Hengshui City Hebei Province
- 169 Datianzhuang Village Dafengying Town Shenzhou City Hengshui City Hebei Province
- 170 Baikou Village Jieguan Town Wuqiang County Hengshui City Hebei Province
- 171 Zhouwo Town Wuqiang County Hengshui City Hebei Province
- 172 Jiazhuang Village Yingzhou Town Hejian City Cangzhou City Hebei Province
- 173 Hancun Town Xian County Cangzhou City Hebei Province
- 174 Gaozhuang Village Anping Town Xianghe County Liangfang City Hebei Province
- 175 Jiangxintun Town Xianghe County Langfang City Hebei Province
- 176 Xiaoheyang Village Huangtuzhuang Town Sanhe County Langfang City Hebei Province
- 177 Wangxinshuang Village Gaozhuang Town Zhuozhou City Baoding City Hebei Province
- 178 Anran Village Jize County Handan City Hebei Province
- 179 Caozhuang Village Yizhuang Town Quzhou County Handan City Hebei Province
- 180 Caowutong Village Huanmadian Town Ningjin County Xingtai City Hebei Province
- 181 Jingjiazhuang Town Xinhe County Xingtai City Hebei Province
- 182 Xijie Village Songcao Town Yuanshi County Shijiazhuang City Hebei Province
- 183 Zhonghan Village Zhonghan Town Gaoyi County Shijiazhuang City Hebei Province
- 184 Sijiazhuang Village Gaoyi Town Gaoyi County Shijiazhuang City Hebei Province
- 185 Xipingle Village Zhengding County Shijiazhuang City Hebei Province
- 186 Xixiangyang Village Xizhang Town Zhao County Shijiazhuang City Hebei Province
- 187 Gangtou Village Changshou Town Xinle City Shijiazhuang City Hebei Province
- 188 Beisu Village Beisu Town Wuji County Shijiazhuang City Hebei Province
- 189 Zhongguantou Village Yanzhao Town Quyang County Baoding City Hebei Province
- 190 Mengzhuang Village Zhaocun Town Dingzhou County Baoding City

- 
- |     |                                                                              |
|-----|------------------------------------------------------------------------------|
|     | Hebei Province                                                               |
| 191 | Shiwuji Village Beihe Town Dingxing County Baoding City Hebei Province       |
| 192 | Futouzhuang Village Zhoucun Town Dingzhou County Baoding City Hebei Province |
-
